# Supplementary material
Source: MDPI journal article supplement (https://www.mdpi.com/2076-3417/11/11/5309)
Supplement: s1 [file s1]

# Supplementary: Carbon Availability and Nitrogen Mineralization Control Denitrification Rates and Product Stoichiometry During Initial Maize Litter Decomposition

Pauline Sophie Rummel <sup>1,\*</sup>, Reinhard Well <sup>2</sup>, Johanna Pausch <sup>3</sup>, Birgit Pfeiffer <sup>1,4</sup> and Klaus Dittert <sup>1</sup>

<sup>1</sup> Section of Plant Nutrition and Crop Physiology, Department of Crop Science, University of Göttingen, 37073 Göttingen, Germany; Birgit.Pfeiffer@biologie.uni-goettingen.de (B.P.); klaus.dittert@agr.uni-goettingen.de (K.D.)

<sup>2</sup> Thünen Institute of Climate-Smart Agriculture, Federal Research Institute for Rural Areas, Forestry and Fisheries, 38116 Braunschweig, Germany; reinhard.well@thuenen.de

<sup>3</sup> Agroecology, Faculty for Biology, Chemistry, and Earth Sciences, University of Bayreuth, 95447 Bayreuth, Germany; Johanna.Pausch@uni-bayreuth.de

<sup>4</sup> Institute of Microbiology and Genetics, Department of Genomic and Applied Microbiology, University of Göttingen, 37073 Göttingen, Germany

\* Correspondence: pauline.rummel@uni-goettingen.de

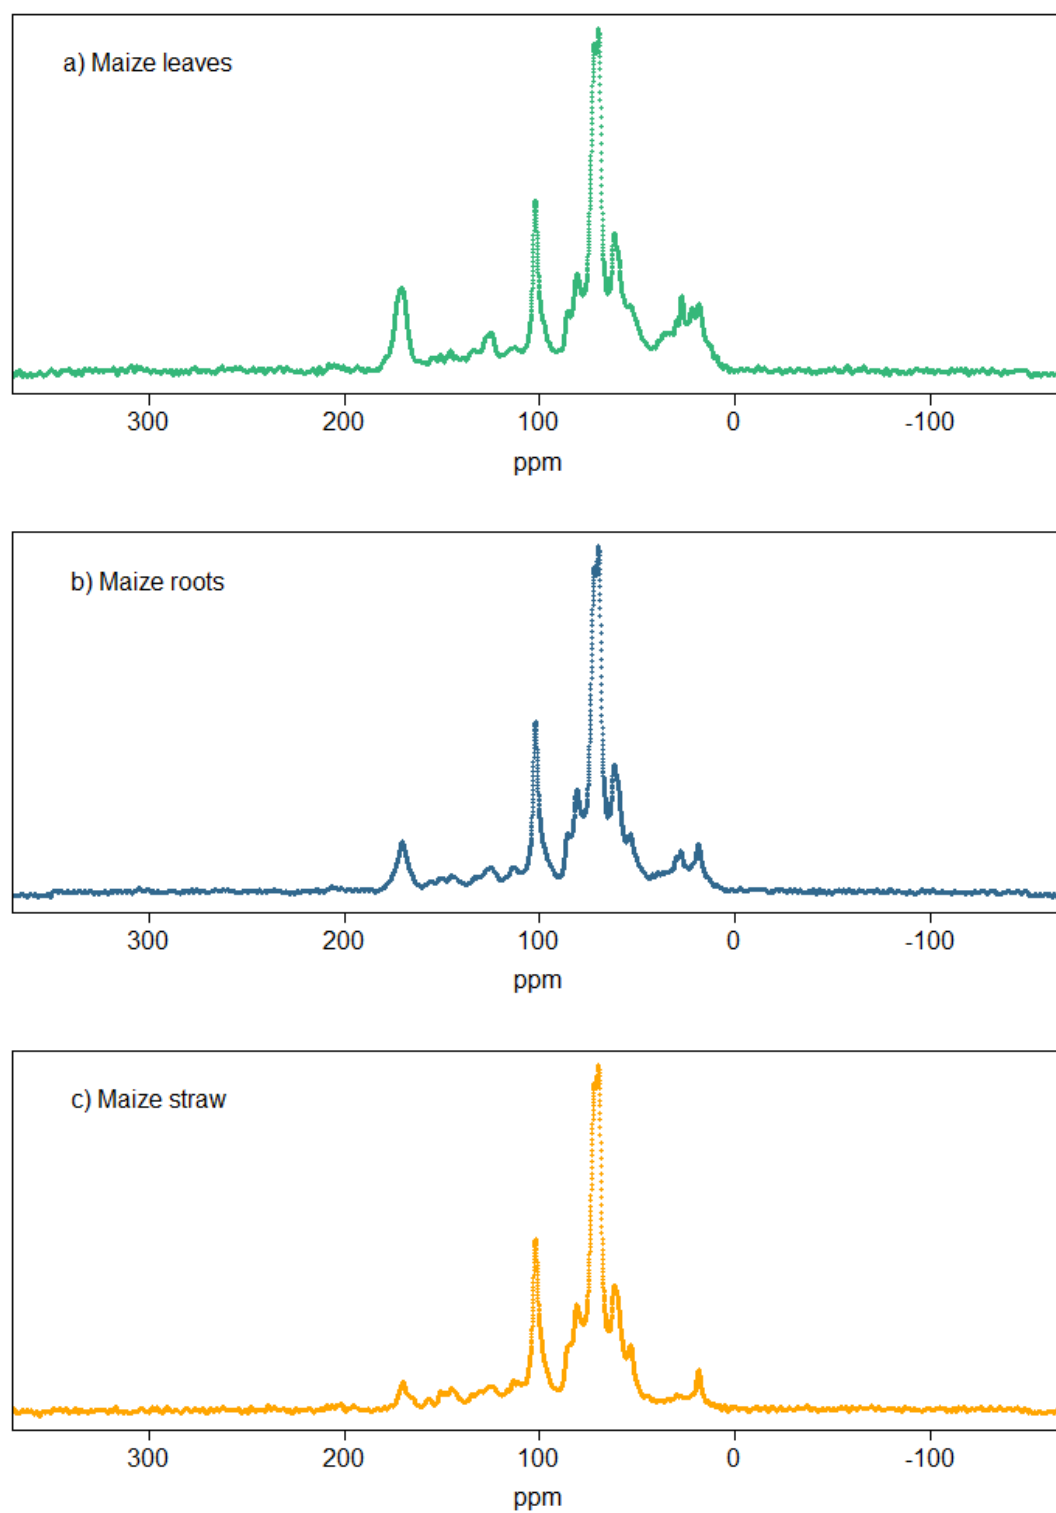

**Figure S1.** a–c: Solid state  $^{13}\text{C}$ -CPMAS NMR spectra of maize litter used in the incubation experiment.

### Determination of $\delta^{13}\text{C}$ of $\text{CO}_2$ respired from maize litter

To determine the  $\delta^{13}\text{C}$  of  $\text{CO}_2$  released from maize litter decomposition, dried maize litter was incubated without soil. Then, 20 g of washed quartz sand were filled into 100 ml glass bottles. Dried and ground maize litter was mixed with sand in amounts equaling  $2 \text{ mg C g}^{-1}$ . To provide incubation conditions similar to the main experiment, 70 g of pre-incubated soil was homogenized with 140 ml of  $\text{H}_2\text{O}_{\text{bidest}}$  and stirred for 45 min. The soil suspension was filtered through paper filters and centrifuged at 5000 rpm for 30 min. The supernatant was discarded, and the pellet was resuspended in  $\text{KNO}_3$  solution. Two milliliters of the soil-microorganisms- $\text{KNO}_3$  solution were added to the sand-litter-mixture providing  $50 \mu\text{g N g}^{-1}$ .

Gas samples were taken from the gas bottles 1, 5, 9, 14, 19, 26, and 33 days after mixing. Before sampling, bottles were flushed for 30 min with  $\text{HeO}_2$  (80:20) at a flowrate of  $50 \text{ ml min}^{-1}$  to remove any  $\text{CO}_2$  from the bottles. Then, soil gases were accumulated in the bottles for 60 min and 25 ml of gas samples were filled in evacuated 12 ml Exetainer® septum-capped vials (Labco, High Wycombe, UK). Samples were introduced by a Combi-Pal autosampler (CTC-Analytics, Zwingen, Switzerland) to a GC (GC-Box, Thermo Fisher Scientific, Bremen, Germany) coupled to an isotope mass spectrometer (Delta plus XP, Thermo Fisher Scientific, Bremen, Germany) via a ConFlo III Interface (Thermo Fisher Scientific, Bremen, Germany).

$\delta^{13}\text{C}$  values of  $\text{CO}_2$  derived from litter are shown in Figure S2. On the first sampling day, values were similar to the Control without litter ( $-13.75\text{‰}$ ). Thus, the mean of 5 to 33 DAO was taken as the average  $\delta^{13}\text{C}$  of  $\text{CO}_2$  derived from maize litter (Leaf =  $-7.910\text{‰}$ , Root =  $-7.497\text{‰}$ , Straw =  $-9.327\text{‰}$ ).

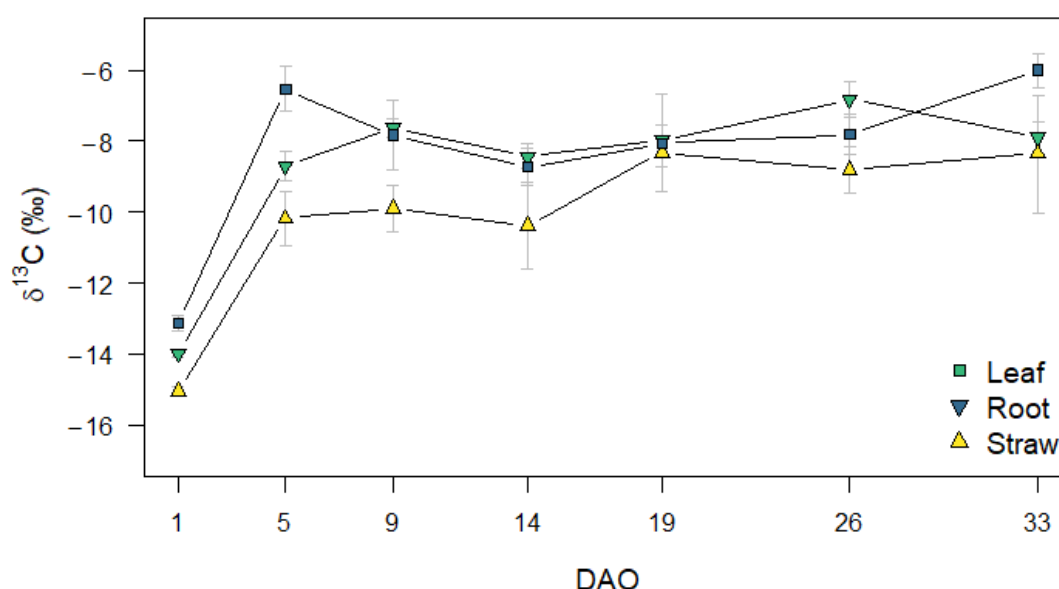

Figure S2.  $\delta^{13}\text{C}$  of  $\text{CO}_2$  derived from maize litter.

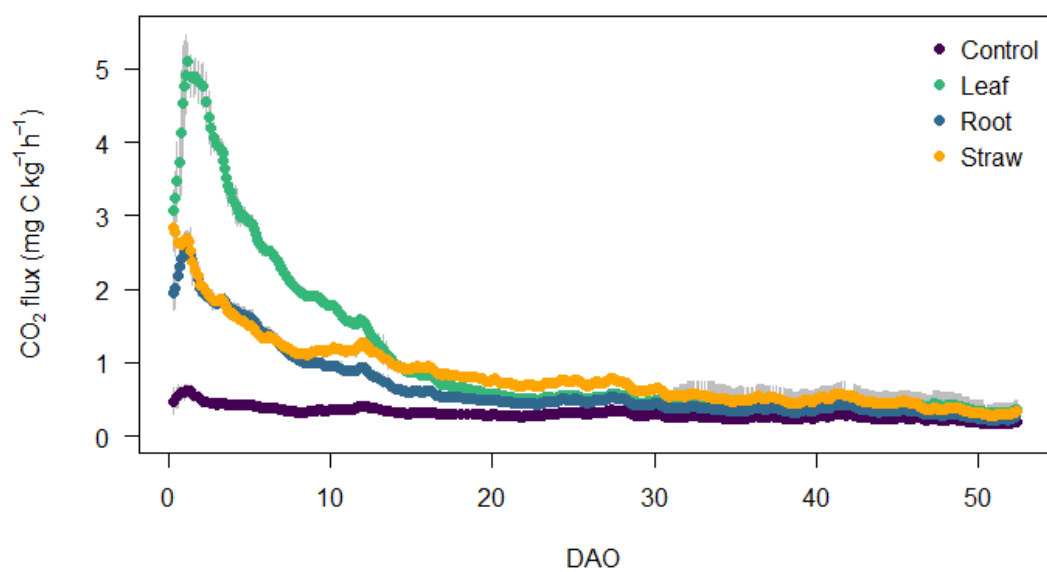

**Figure S3.** Total CO<sub>2</sub> efflux from soil during oxic incubation from Day 0 to Day 46 and during an-oxic incubation from Day 47 to Day 55 (means and standard deviation for n = 5, n = 4 for Control, when not visible, error bars are smaller than the symbols).

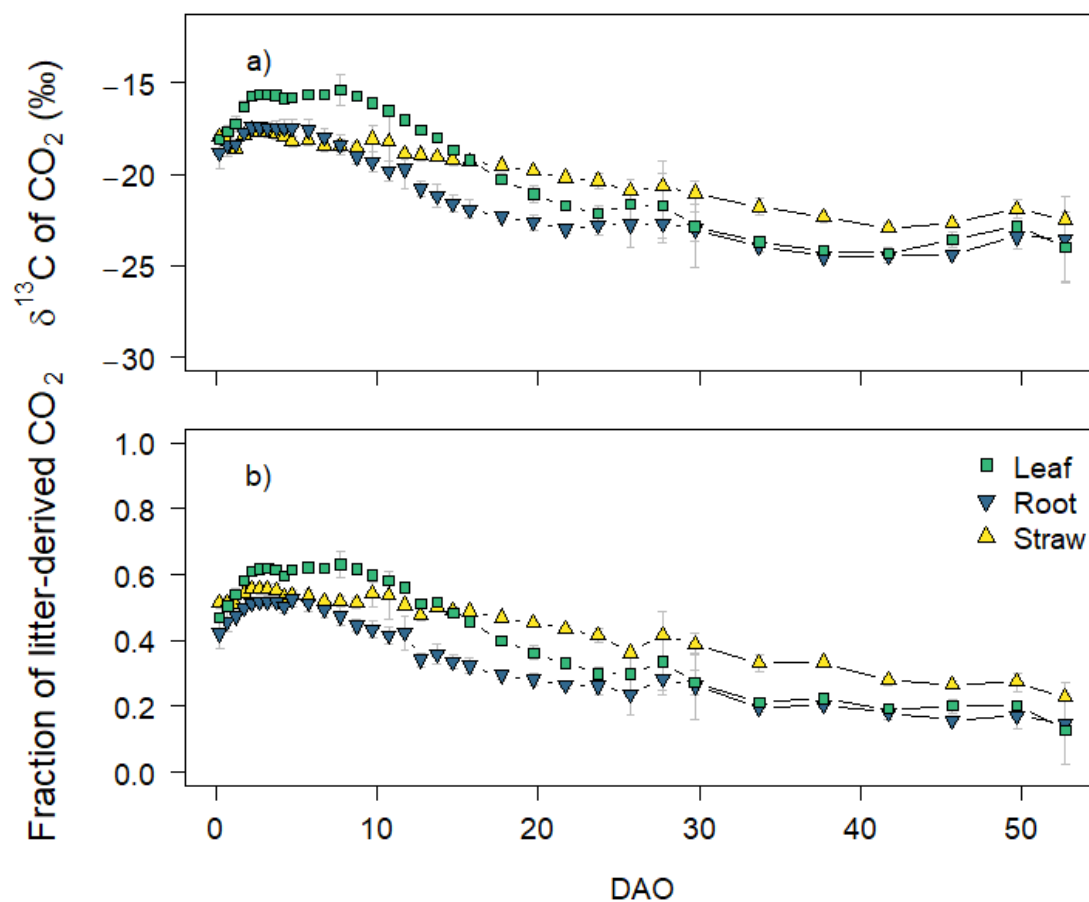

**Figure S4.** a:  $\delta^{13}\text{C}$  of  $\text{CO}_2$  evolving from soil and b: fraction of litter-derived  $\text{CO}_2$  (means and standard deviation for  $n = 5$ ,  $n = 4$  for Control, when not visible, error bars are smaller than the symbols).

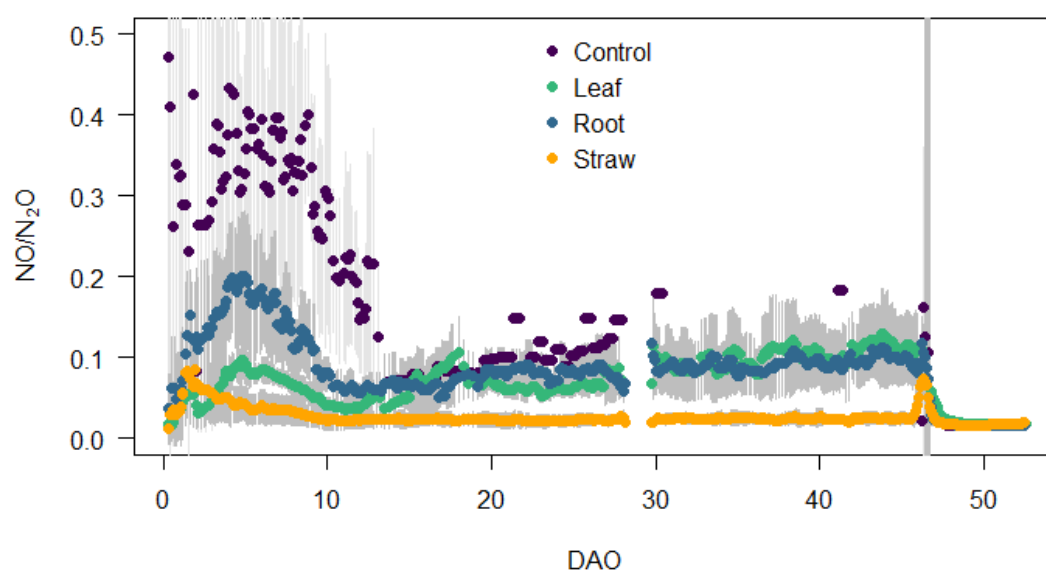

**Figure S5.** NO/N<sub>2</sub>O ratio during oxidic incubation from Day 0 to Day 46 and during anoxic incubation from Day 47 to Day 55 (means and standard deviation for n = 5, n = 4 for Control, when not visible, error bars are smaller than the symbols).

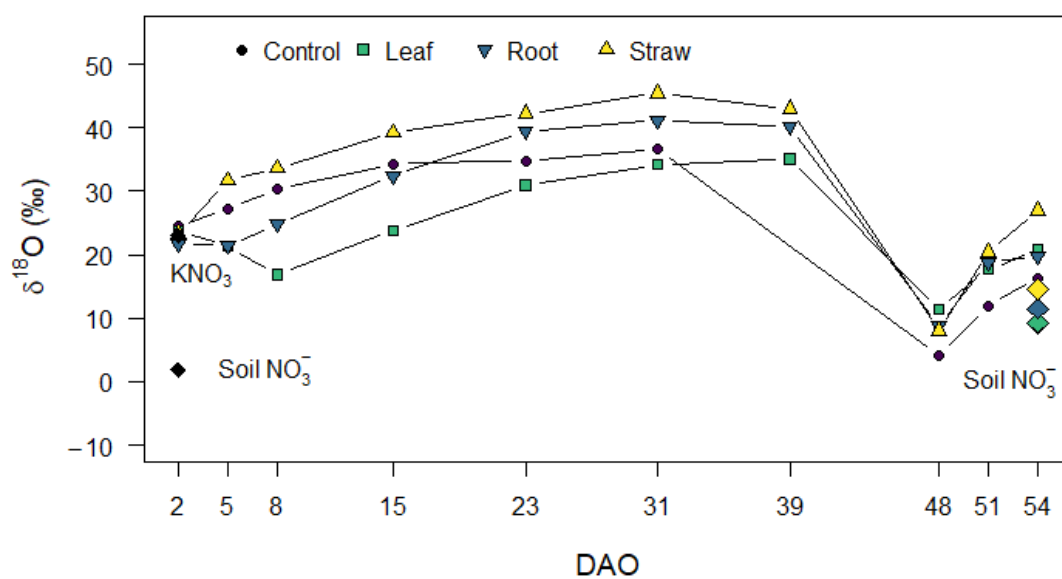

**Figure S6.**  $\delta^{18}\text{O}$  of  $\text{N}_2\text{O}$  (colored symbols and lines), added  $\text{KNO}_3$ , and soil  $\text{NO}_3^-$  at first and last day of incubation.  $\delta^{18}\text{O}$  of  $\text{N}_2\text{O}$  was corrected for  $\delta^{18}\text{O}$  of soil water ( $-6.7$  ‰) (means for  $n = 5$ ,  $n = 4$  for Control).

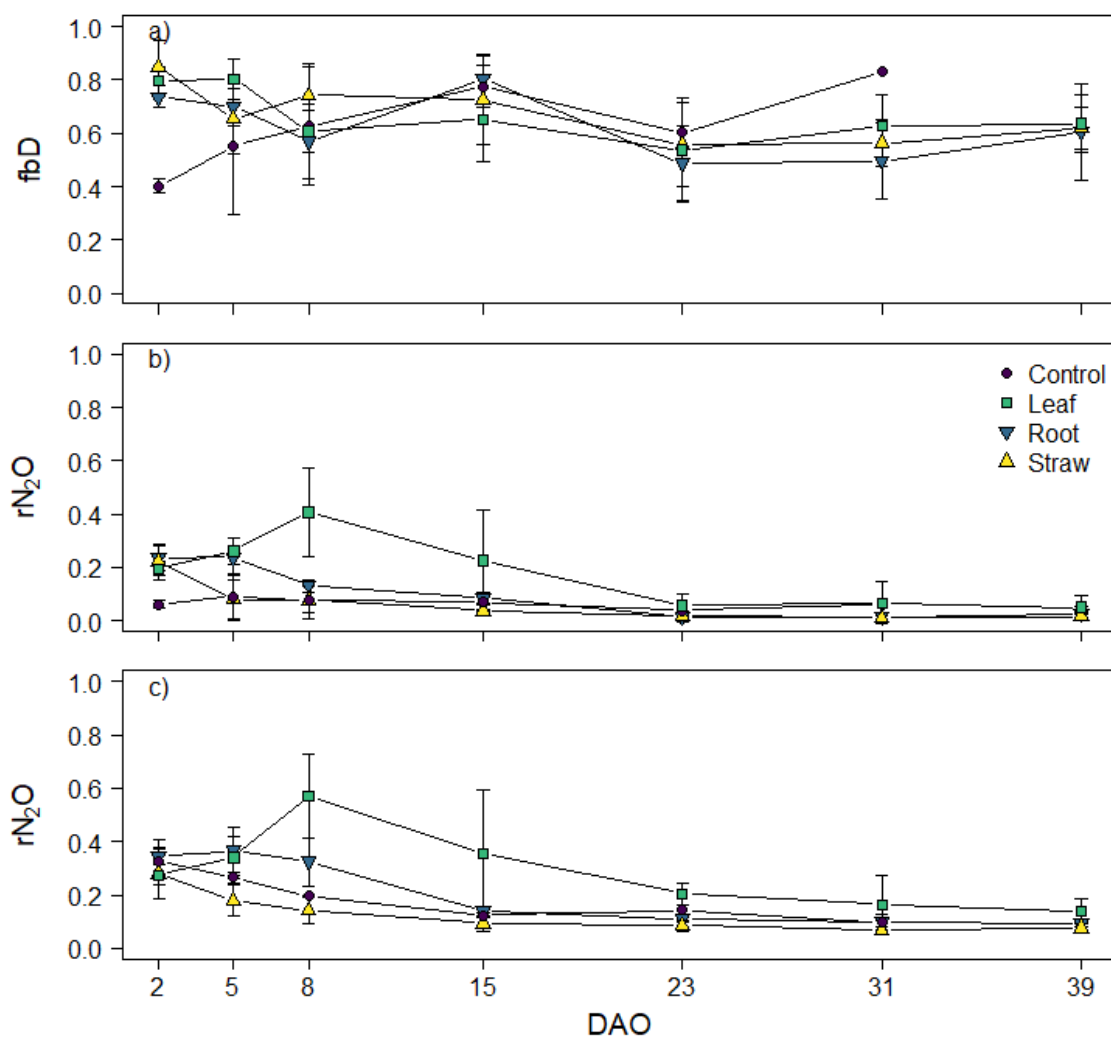

**Figure S7.** a: Fraction of N<sub>2</sub>O originating from heterotrophic bacterial denitrification/nitrifier denitrification (fbD) and b+c: fraction of residual unreduced N<sub>2</sub>O (rN<sub>2</sub>O). Values were calculated based on the isotopocule mapping approach by Lewicka-Szczebak et al. (2017) [1] and represent results for scenario 1 (b, reduction-mixing) and scenario 2 (c, mixing-reduction) of bacterial denitrification with nitrification (mean and standard deviation for n = 5, data points missing for samples with an isotopic signature outside the reduction-mixing area, no N<sub>2</sub>O emitted from Control on 39 DAO).

**Table S1.**  $\delta^{15}\text{N}^{\text{SP}}_{\text{N}_2\text{O}}$ ,  $\delta^{18}\text{O}_{\text{N}_2\text{O}/\text{H}_2\text{O}}$ , and  $\delta^{15}\text{N}^{\text{bulk}}_{\text{N}_2\text{O}}$  endmember values from literature used for isotopocule mapping.

| Process                                 | $\delta^{15}\text{N}^{\text{SP}}_{\text{N}_2\text{O}}$ |      |      |      | $\delta^{18}\text{O}_{\text{N}_2\text{O}/\text{H}_2\text{O}}$ |      |      |       | $\delta^{15}\text{N}^{\text{bulk}}_{\text{N}_2\text{O}}$ |       |       | References |
|-----------------------------------------|--------------------------------------------------------|------|------|------|---------------------------------------------------------------|------|------|-------|----------------------------------------------------------|-------|-------|------------|
|                                         | Min                                                    | Max  | Mean |      | Min                                                           | Max  | Mean |       | Min                                                      | Max   | Mean  |            |
| Heterotrophic bacterial denitrification | −7.5                                                   | 3.7  | −1.9 | −3.9 | 16.7                                                          | 23.3 | 19.2 | 17.55 | −52.8                                                    | 2.3   | −25.9 | [2–5]      |
| Nitrifier denitrification               | −13.6                                                  | 1.9  | −5.9 |      | 12.4                                                          | 19.4 | 15.9 |       | −60.7                                                    | −53.1 | −56.9 | [3,6]      |
| Fungal denitrification                  | 27.2                                                   | 39.9 | 33.5 |      | 42.0                                                          | 55.1 | 47.2 |       | −46.0                                                    | −31.0 | −38.0 | [7–10]     |
| Nitrification                           | 32.0                                                   | 38.7 | 35.0 |      | 20.5                                                          | 26.5 | 23.5 |       | −64.0                                                    | −47.0 | −57.0 | [3,6]      |

**Table S2:** Cumulative CO<sub>2</sub>, NO, N<sub>2</sub>O, and N<sub>2</sub> emissions and denitrification product ratio standardized against litter C input.

|              | Total CO <sub>2</sub><br>(mg C g <sup>-1</sup> C input) |      | Total N <sub>2</sub> O<br>(mg N g <sup>-1</sup> C input) |      | Total N <sub>2</sub><br>(mg N g <sup>-1</sup> C input) |      | Total NO<br>(mg N g <sup>-1</sup> C input) |      | N <sub>2</sub> O/(N <sub>2</sub> O+N <sub>2</sub> ) |   |
|--------------|---------------------------------------------------------|------|----------------------------------------------------------|------|--------------------------------------------------------|------|--------------------------------------------|------|-----------------------------------------------------|---|
| Maize Leaves | 240.2 ± 22.5                                            | n.s. | 5.73 ± 1.72                                              | n.s. | 1.30 ± 0.84                                            | n.s. | 0.13 ± 0.02                                | n.s. | 0.83 ± 0.04                                         | a |
| Maize Roots  | 227.9 ± 20.7                                            | n.s. | 6.62 ± 0.46                                              | n.s. | 1.15 ± 0.48                                            | n.s. | 0.13 ± 0.02                                | n.s. | 0.85 ± 0.05                                         | a |
| Maize Straw  | 220.1 ± 7.8                                             | n.s. | 5.74 ± 0.20                                              | n.s. | 1.90 ± 0.48                                            | n.s. | 0.11 ± 0.01                                | n.s. | 0.75 ± 0.05                                         | b |

Values represent means (n = 5) ± standard deviation. Different letters in the same column indicate a significant difference according to the LSD post hoc tests at  $p \leq 0.05$ . n.s. indicates no significant difference.

## References

1. Lewicka-Szczebak, D.; Augustin, J.; Giesemann, A.; Well, R. Quantifying N<sub>2</sub>O reduction to N<sub>2</sub> based on N<sub>2</sub>O isotopocules-validation with independent methods (helium incubation and <sup>15</sup>N gas flux method). *Biogeosciences* **2017**, *14*, 711–732, doi:10.5194/bg-14-711-2017.
2. Toyoda, S.; Mutoke, H.; Yamagishi, H.; Yoshida, N.; Tanji, Y. Fractionation of N<sub>2</sub>O isotopomers during production by denitrifier. *Soil Biol. Biochem.* **2005**, *37*, 1535–1545, doi:10.1016/j.soilbio.2005.01.009.
3. Sutka, R.L.; Ostrom, N.E.; Ostrom, P.H.; Breznak, J.A.; Gandhi, H.; Pitt, A.J.; Li, F. Distinguishing Nitrous Oxide Production from Nitrification and Denitrification on the Basis of Isotopomer Abundances. *Appl. Environ. Microbiol.* **2006**, *72*, 638–644, doi:10.1128/AEM.72.1.638–644.2006.
4. Kool, D.M.; Wrage, N.; Oenema, O.; Van Kessel, C.; Van Groenigen, J.W. Oxygen exchange with water alters the oxygen isotopic signature of nitrate in soil ecosystems. *Soil Biol. Biochem.* **2011**, *43*, 1180–1185, doi:10.1016/j.soilbio.2011.02.006.
5. Snider, D.M.; Venkiteswaran, J.J.; Schiff, S.L.; Spoelstra, J. A new mechanistic model of  $\delta^{18}\text{O}$ -N<sub>2</sub>O formation by denitrification. *Geochim. Cosmochim. Acta* **2013**, *112*, 102–115, doi:10.1016/j.gca.2013.03.003.
6. Frame, C.H.; Casciotti, K.L. Biogeochemical controls and isotopic signatures of nitrous oxide production by a marine ammonia-oxidizing bacterium. *Biogeosciences* **2010**, *7*, 2695–2709, doi:10.5194/bg-7-2695-2010.
7. Rohe, L.; Well, R.; Lewicka-Szczebak, D. Use of oxygen isotopes to differentiate between nitrous oxide produced by fungi or bacteria during denitrification. *Rapid Commun. Mass Spectrom.* **2017**, *31*, 1297–1312, doi:10.1002/rcm.7909.
8. Rohe, L.; Anderson, T.H.; Braker, G.; Flessa, H.; Giesemann, A.; Lewicka-Szczebak, D.; Wrage-Mönnig, N.; Well, R. Dual isotope and isotopomer signatures of nitrous oxide from fungal denitrification - A pure culture study. *Rapid Commun. Mass Spectrom.* **2014**, *28*, 1893–1903, doi:10.1002/rcm.6975.
9. Maeda, K.; Spor, A.; Edel-Hermann, V.; Heraud, C.; Breuil, M.C.; Bizouard, F.; Toyoda, S.; Yoshida, N.; Steinberg, C.; Philippot, L. N<sub>2</sub>O production, a widespread trait in fungi. *Sci. Rep.* **2015**, *5*, 1–7, doi:10.1038/srep09697.
10. Sutka, R.L.; Adams, G.C.; Ostrom, N.E.; Ostrom, P.H. Isotopologue fractionation during N<sub>2</sub>O production by fungal denitrification. *Rapid Commun. Mass Spectrom.* **2008**, *22*, 3989, doi:10.1002/rcm.3820.
